# Supplementary material for: Country-wide genomic surveillance of SARS-CoV-2 strains
Source: bioRxiv or medRxiv preprint supplement (doi:10.1101/2021.06.08.447365), 2021-06-09

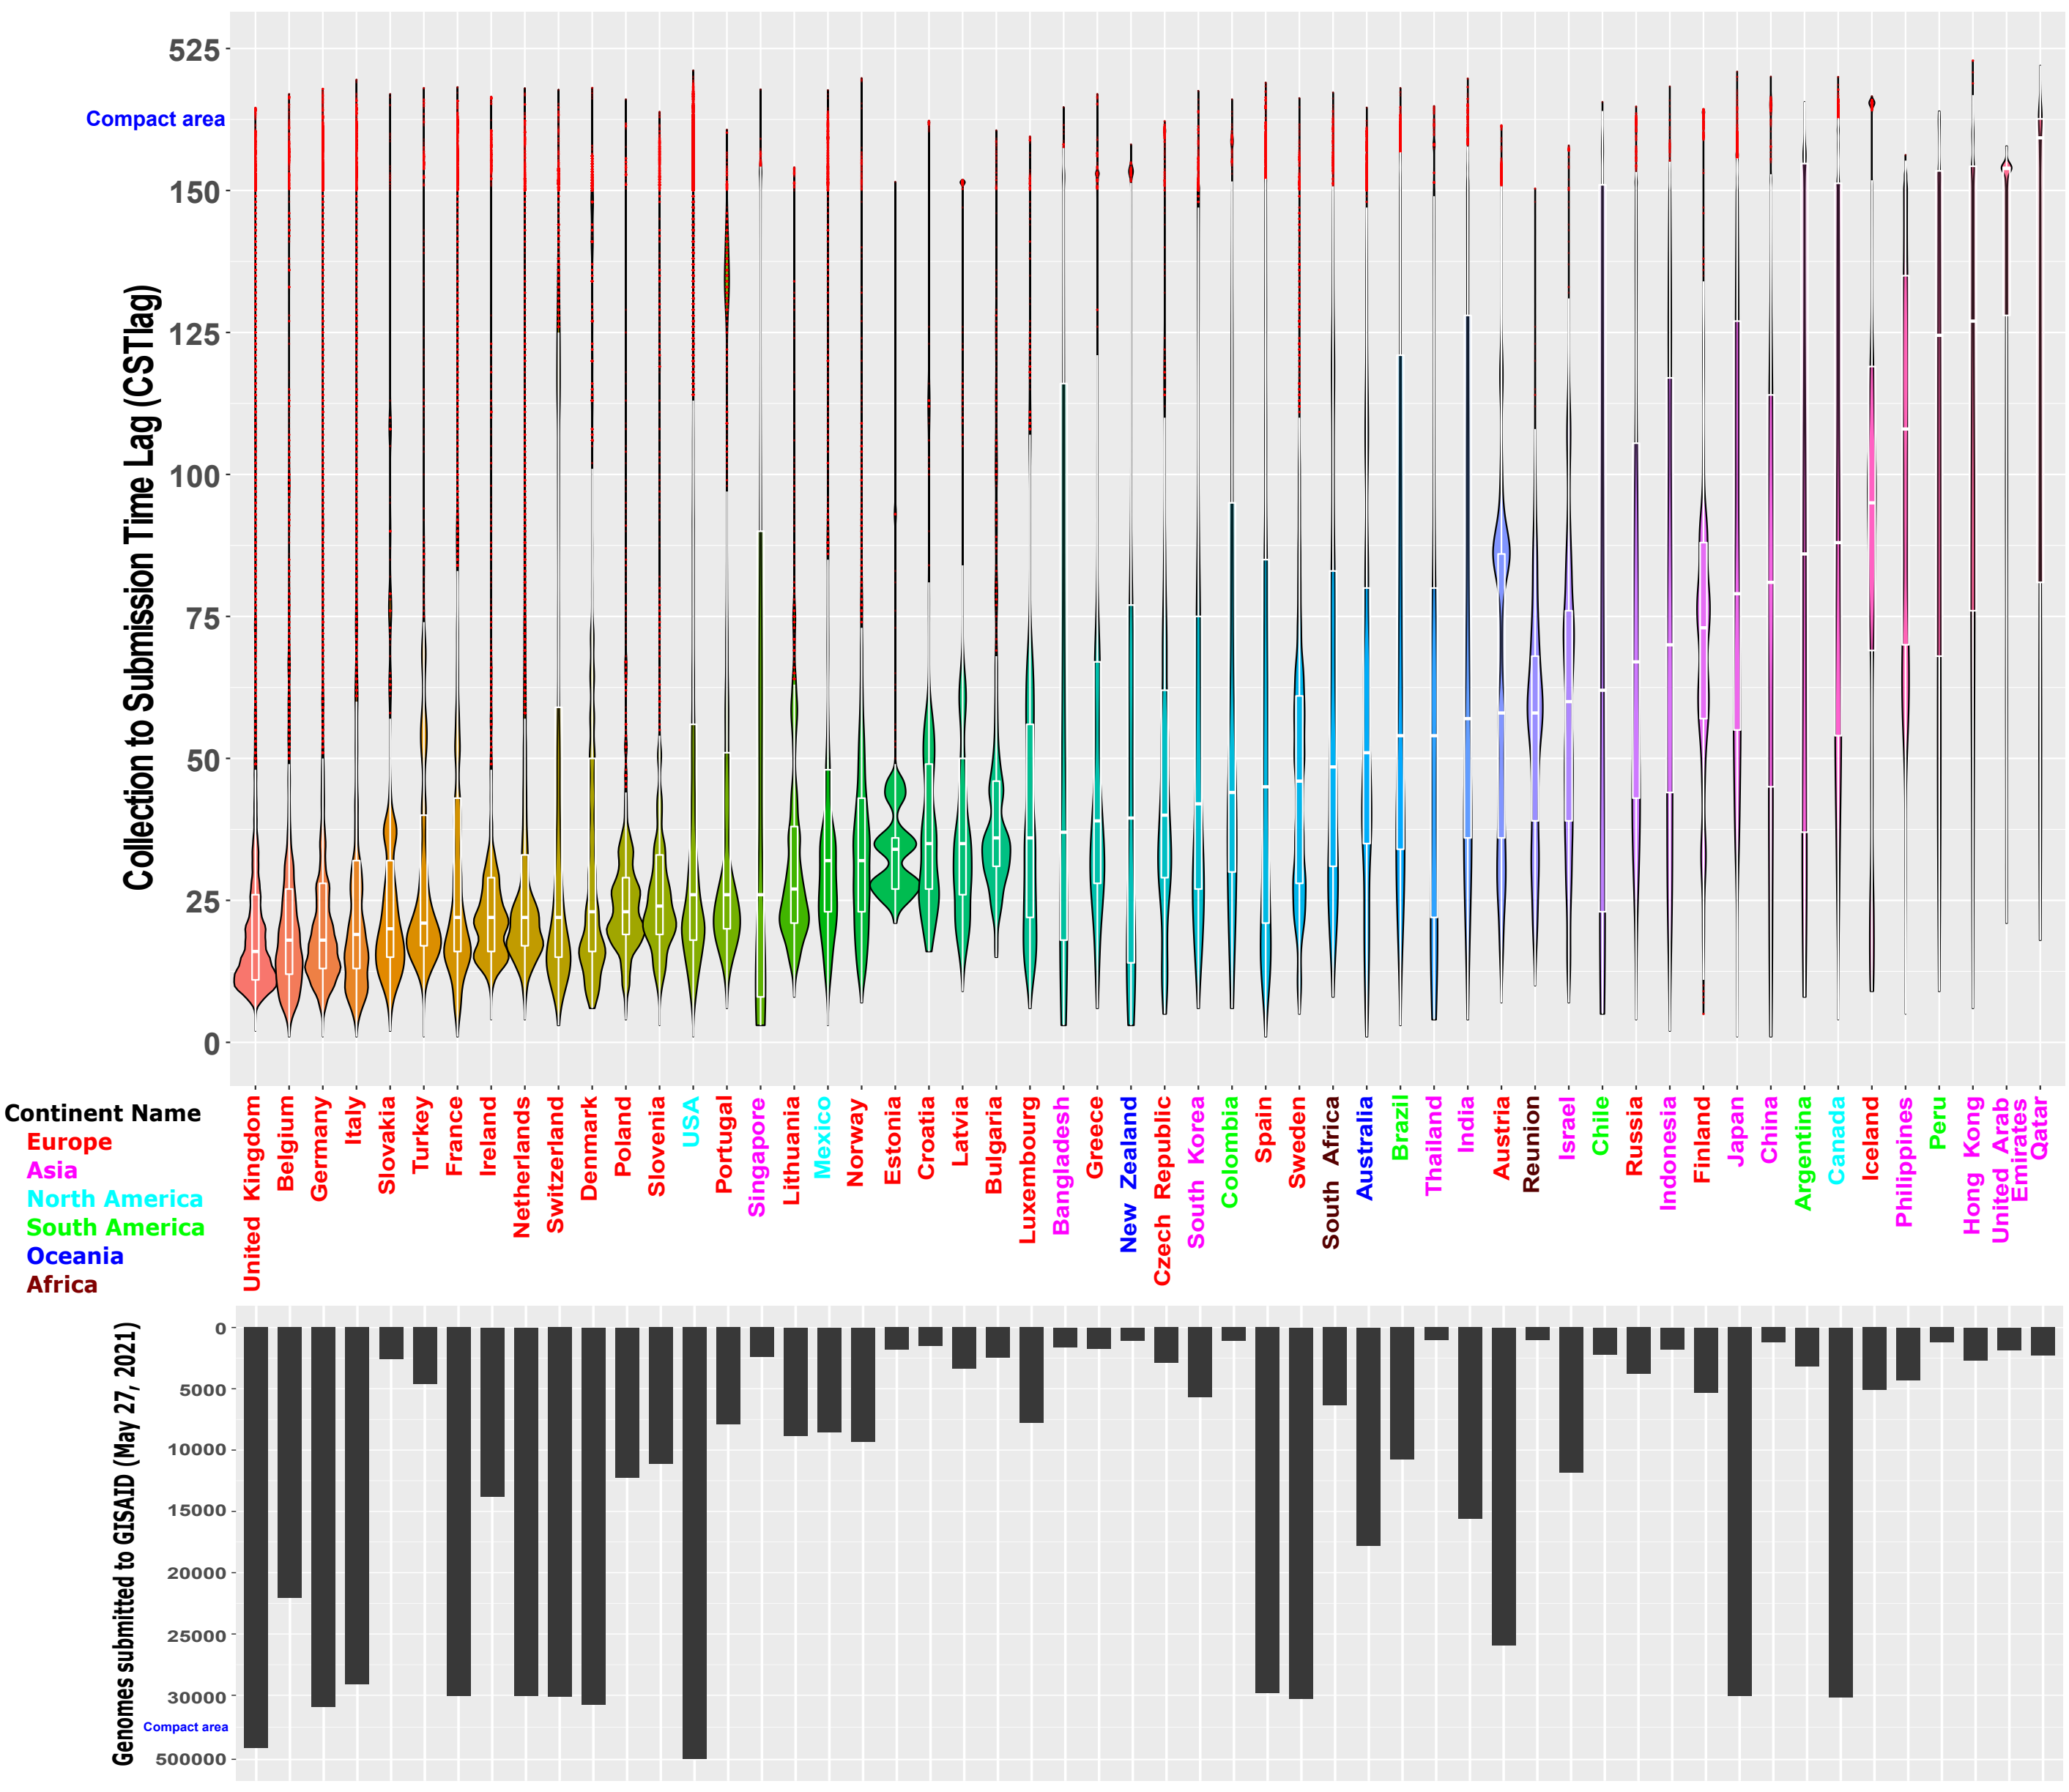

Supplement: Supplementary file [file media-1.zip]
